# Supplementary material for: Predictive functional, statistical and structural analysis of CSNK2A1 and CSNK2B variants linked to neurodevelopmental diseases
Source: Front Mol Biosci. 2022 Oct 13;9:851547. doi: 10.3389/fmolb.2022.851547 (PMC9608649; doi:10.3389/fmolb.2022.851547)
Supplement: Supplementary file 2 [file Table2.XLSX]

## Sheet: Table legend
Table S2. Residues with more that one mutation and significant variant distribution
Sheet "Residues": Residues in CK2a and CK2b with more than one mutation. Residues with more than 1 distinct variant/mutation are included. S51R was coded by two different variants.
Sheets "CK2a" and "CK2b". Identification of significant variant distribution utilizing the statistical test described below
Exact chi-square Test of a Proportion for CK2a and CK2b mutations
The number of potential variants per codon = 9. If we assume that each of the 9 variants per codon are equally likely, then the counts across the 9 mutations will follow a multinomial distribution with the probability of observing each type = 1/9 (0.11).
H0: proportion = 0.11 (P)
Ha: observed proportion not equal to 0.11 (p)
We calculated an exact chi-square test statistic comparing the observed mutation probabilities to those expected by chance and present the corresponding p-value

## Sheet: Residues
CK2a Residue	Distinct mutations (#)	Mutations			CK2b Residue	Distinct mutations (#)	Mutations
51	4	S51I			1	4	c.1A>G
		S51N					c.2T>A
		S51R (c.151A>C)					c.3G>A
		S51R (c.153T>A)					c.2T>G
39	3	Y39C			137	3	C137R
		Y39S					C137G
		Y39*					C137F
50	3	Y50C			32	2	D32N
		Y50F					D32A
		Y50S			34	2	F34S
156	3	D156H					F34C
		D156E			77	2	E77K
		D156Y					E77*
47	2	R47G			101	2	c.303C>A
		R47Q					c.303C>G
80	2	R80C			187	2	L187P
		R80H					L187R
158	2	K158E
		K158R
161	2	N161D
		N161S
175	2	D175G
		D175E
191	2	R191Q
		R191*
312	2	R312W
		R312Q

## Sheet: CK2a 
mutation	nucleotide change	patient #	total patients/codon	Expected percentage	Observed percentage	p-value
R47G	c.139C>G	3	11	0.11	0.272727	<0.0001
R47Q	c.140G>A	8	11	0.11	0.727273
Y50C	c.149A>G	9	11	0.11	0.818182	<0.0001
Y50F	c.149A>T	1	11	0.11	0.0909091
Y50S	c.149A>C	1	11	0.11	0.0909091
R80C	c.238C>T	1	6	0.11	0.166667	0.0006
R80H	c.239G>A	5	6	0.11	0.833333
R107*	c.319C>T	2	2	0.11	1	0.0968
D156H	c.466G>C	1	4	0.11	0.25	0.3735
D156E	c.468T>A	2	4	0.11	0.5
D156Y	c.466G>T	1	4	0.11	0.25
K158E	c.472A>G	1	2	0.11	0.5	0.7888
K158R	473A>G	1	2	0.11	0.5
H160R	c.479A>G	4	4	0.11	1	0.0012
D175G	c.524A>G	2	3	0.11	0.666667	0.236
D175E	c.596G>A	1	3	0.11	0.333333
R191Q	c.572G>A	2	5	0.11	0.4	0.0153
R191*	c.571C>T	3	5	0.11	0.6
R195*	c.583C>T	3	3	0.11	1	0.0106
K198R	c.593A>G	24	24	0.11	1	<0.0001
R312Q	c.935G>A	2	5	0.11	0.4	0.0153
R312W	c.934C>T	3	5	0.11	0.6
T326Sfs*13	c.976_977insG	2	2	0.11	1	0.0968
P382L	c.1145C>T	2	2	0.11	1	0.0968

## Sheet: CK2b
mutation	nucleotide change	patient #	total patients/codon	Expected percentage	Observed percentage	p-value
M1?	c.1A>G	3	6	0.111111	0.5	0.144
M1?	c.2T>A	1	6	0.111111	0.166667
M1?	c.3G>A	1	6	0.111111	0.166667
M1?	c.2T>G	1	6	0.111111	0.166667
W9*	c.27del	2	2	0.111111	1	0.0968
D32N	c.94G>A	6	7	0.111111	0.857143	<0.0001
D32A	c.95A>C	1	7	0.111111	0.142857
F34S	c.101T>C	1	2	0.111111	0.5	0.7888
F34C	c.101T>G	1	2	0.111111	0.5
Q42*	c.124C>T	2	2	0.111111	1	0.0968
R47*	c.139C>T	6	6	0.111111	1	<0.0001
E77K	c.229G>A	2	3	0.111111	0.666667	0.236
E77*	c.229G>T	1	3	0.111111	0.333333
R86C	c.256C>T	4	4	0.111111	1	0.0012
Y101*	c.303C>A	2	3	0.111111	0.666667	0.236
Y101*	C.303C>G	1	3	0.111111	0.333333
R111P	c.332G>C	3	3	0.111111	1	0.0106
C137R	c.409T>C	1	4	0.111111	0.25	0.3735
C137G	c.409T>G	1	4	0.111111	0.25
C137F	c.410G>T	2	4	0.111111	0.5
H165R	c.494A>G	3	3	0.111111	1	0.0106
L187P	c.560T>C	1	2	0.111111	0.5	0.7888
L187R	c.560T>G	1	2	0.111111	0.5
